# Supplementary material for: Reactive short-chain leaf volatiles act as powerful inducers of abiotic stress-related gene expression
Source: PubMed Central journal article supplement — Sci Rep. 2015 Jan 26;5:8030. doi: 10.1038/srep08030 (PMC4306126; doi:10.1038/srep08030), 2015-01-26
Supplement: srep08030-s1.pdf [file srep08030-s1.pdf]

**Title: Reactive short-chain leaf volatiles act as powerful inducers of abiotic stress-related gene expression**

**Authors:** Yasuo Yamauchi,\* Mikiko Kunishima, Masaharu Mizutani, Yukihiro Sugimoto

**Affiliations:** Graduate School of Agricultural Science, Kobe University, Rokkodai 1-1, Nada, Hyogo 657-8501, Japan

\*Correspondence to: [yamauchi@kobe-u.ac.jp](mailto:yamauchi@kobe-u.ac.jp) (Y.Y.)

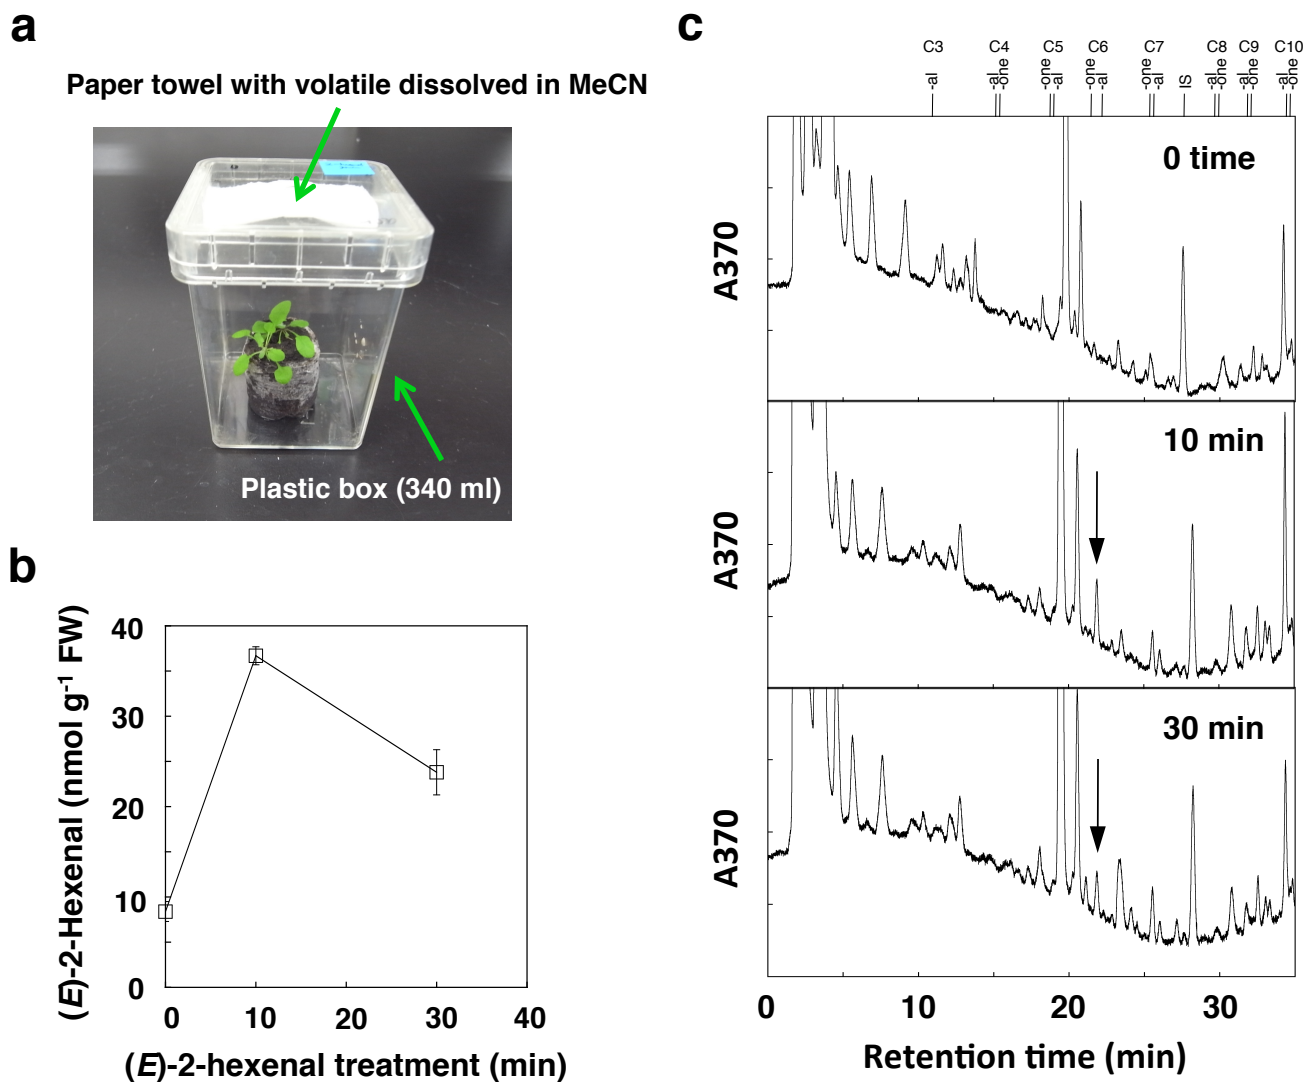

Fig. S1 (Yamauchi)

Transient increase in (*E*)-2-hexenal in *Arabidopsis* treated at 10 nmol cm<sup>-3</sup>. **a**, Treatment of plants with SLVs. **b**, Changes in (*E*)-2-hexenal content. Data are means  $\pm$  SE ( $n = 3$ ). **c**, Typical HPLC chromatogram. Arrows indicate peaks of DNP-(*E*)-2-hexenal. The retention times of authentic DNP-RSLVs and the internal standard (IS) are shown above the chromatogram.

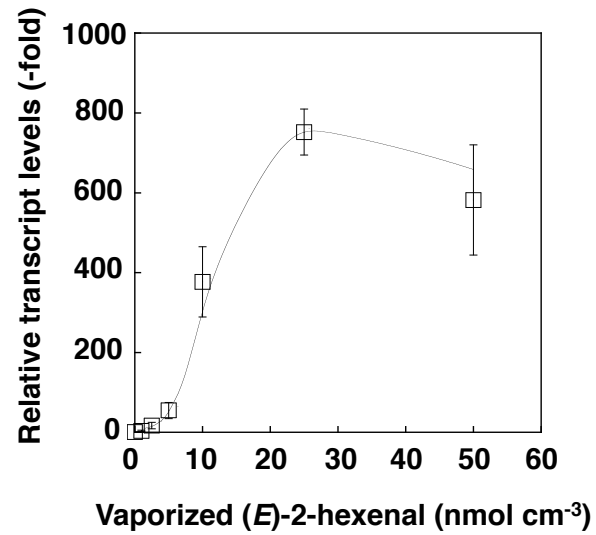

Fig. S2 (Yamauchi)

*Arabidopsis* plants were exposed to various concentration of (E)-2-hexenal for 30 min to determine dose-dependence of *HSFA2* expression. Expression of the *HSFA2* gene was determined using qRT-PCR. Relative transcript levels were normalized to *ACTIN2* mRNA. Data are means  $\pm$  SE (n = 3).

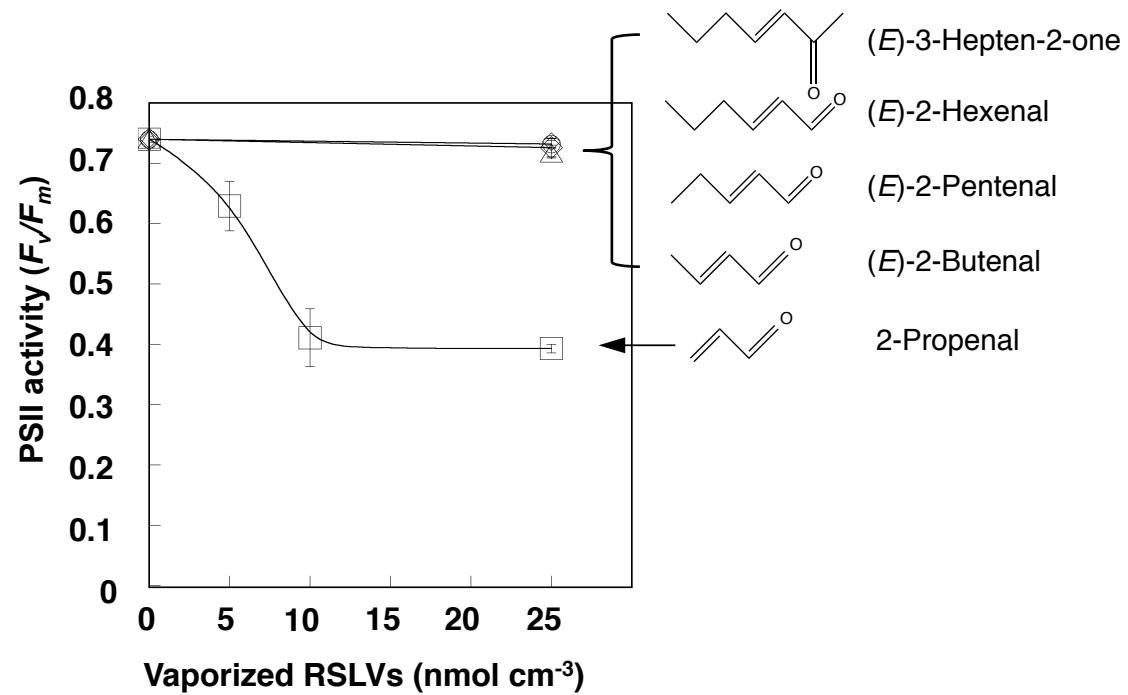

Fig. S3 (Yamauchi)

To determine toxicity of the RSLVs, Arabidopsis plants were exposed to various concentrations of 2-propenal (open square), (*E*)-2-butenal (open diamond), (*E*)-2-pentenal (open circle), (*E*)-2-hexenal (open triangle), or (*E*)-3-hepten-2-one. After 90 min, residual PSII activity ( $F_v/F_m$ ) was measured. Data are means  $\pm$  SE ( $n = 3$ ).

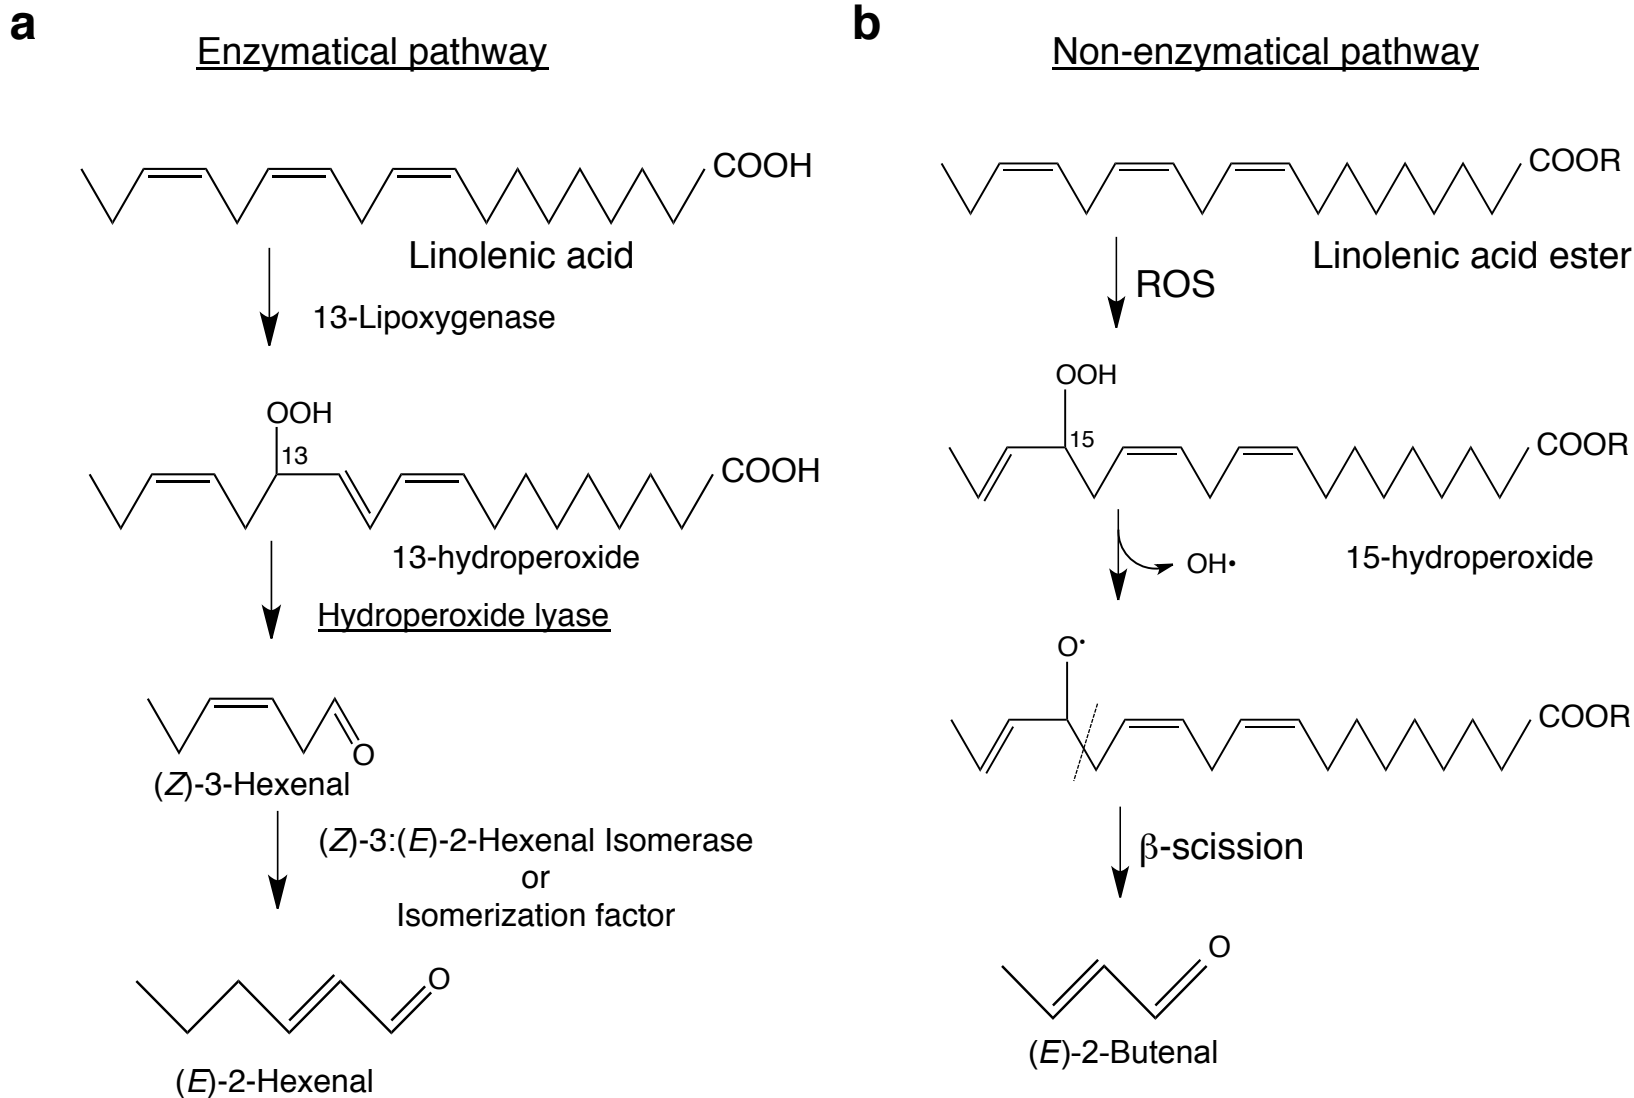

Fig. S4. (Yamauchi)

Pathways for production of RSLVs in plants. (E)-2-Hexenal and (E)-2-butenal are mainly produced via enzymatical (a) and non-enzymatical (b, referred from 34) pathways, respectively.

**a**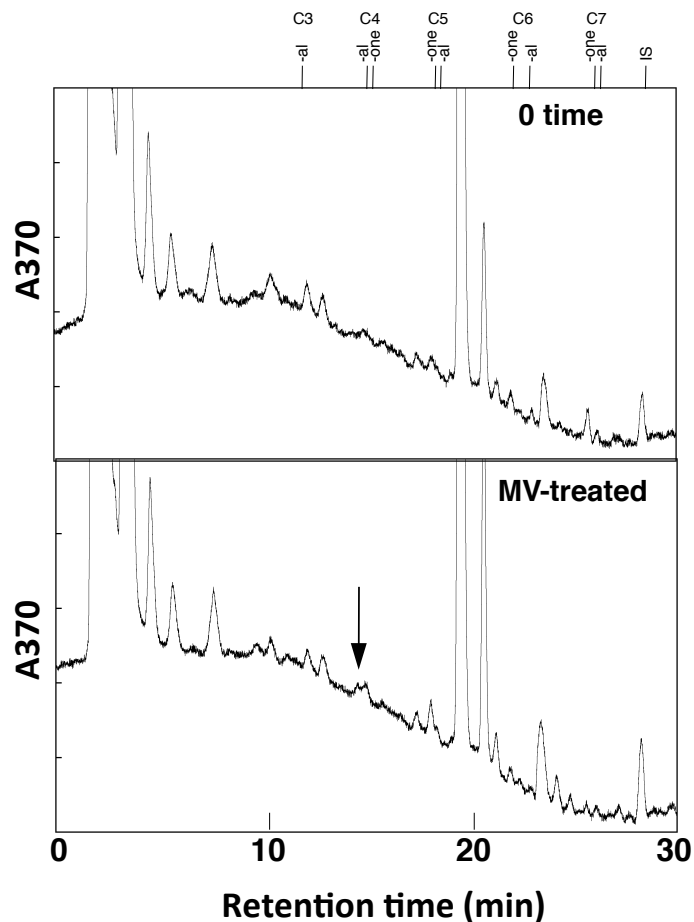**b**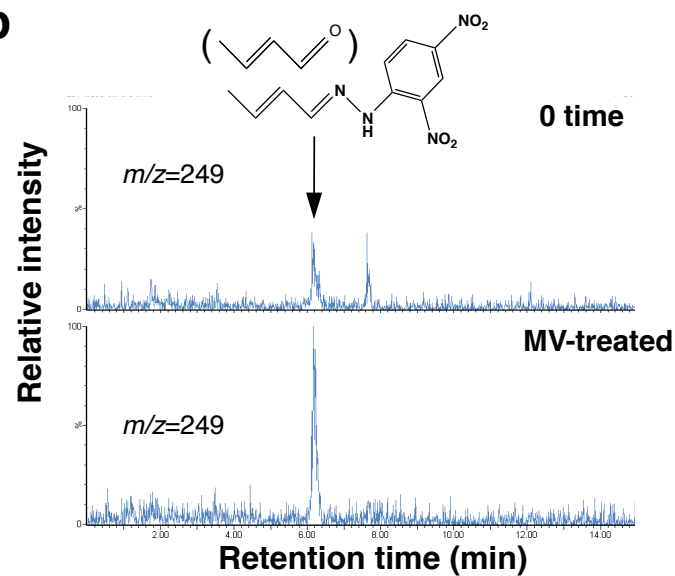**c**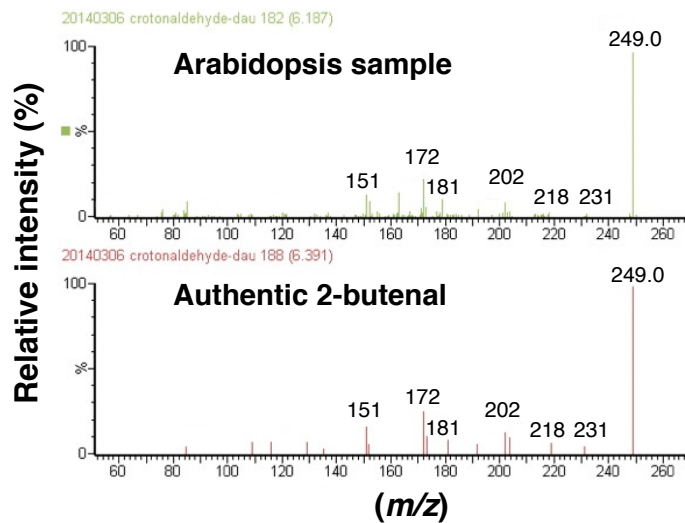

**Fig. S5. (Yamauchi)**

Determination of (*E*)-2-butenal as endogenous RSLV produced under oxidative stress. *Arabidopsis* leaflets were treated with 10  $\mu\text{M}$  MV in the presence of light (80  $\mu\text{mol m}^{-2} \text{s}^{-1}$ ) for an hour. **a**, Typical chromatogram of HPLC analysis of DNP-carbonyls of MV-untreated (top) and MV-treated *Arabidopsis* (bottom). Arrow indicates peak of DNP-(*E*)-2-butenal. The retention times of authentic DNP-RSLVs and the internal standard (IS) are shown above the chromatogram. **b**, Typical chromatogram (selected reaction monitoring) of 2-butenal-DNP by LC-MS/MS analysis. Other RSLVs did not increase significantly after MV treatment. **c**, Full-scan spectra of fragment ions of endogenous (top) and authentic 2-butenal (bottom).

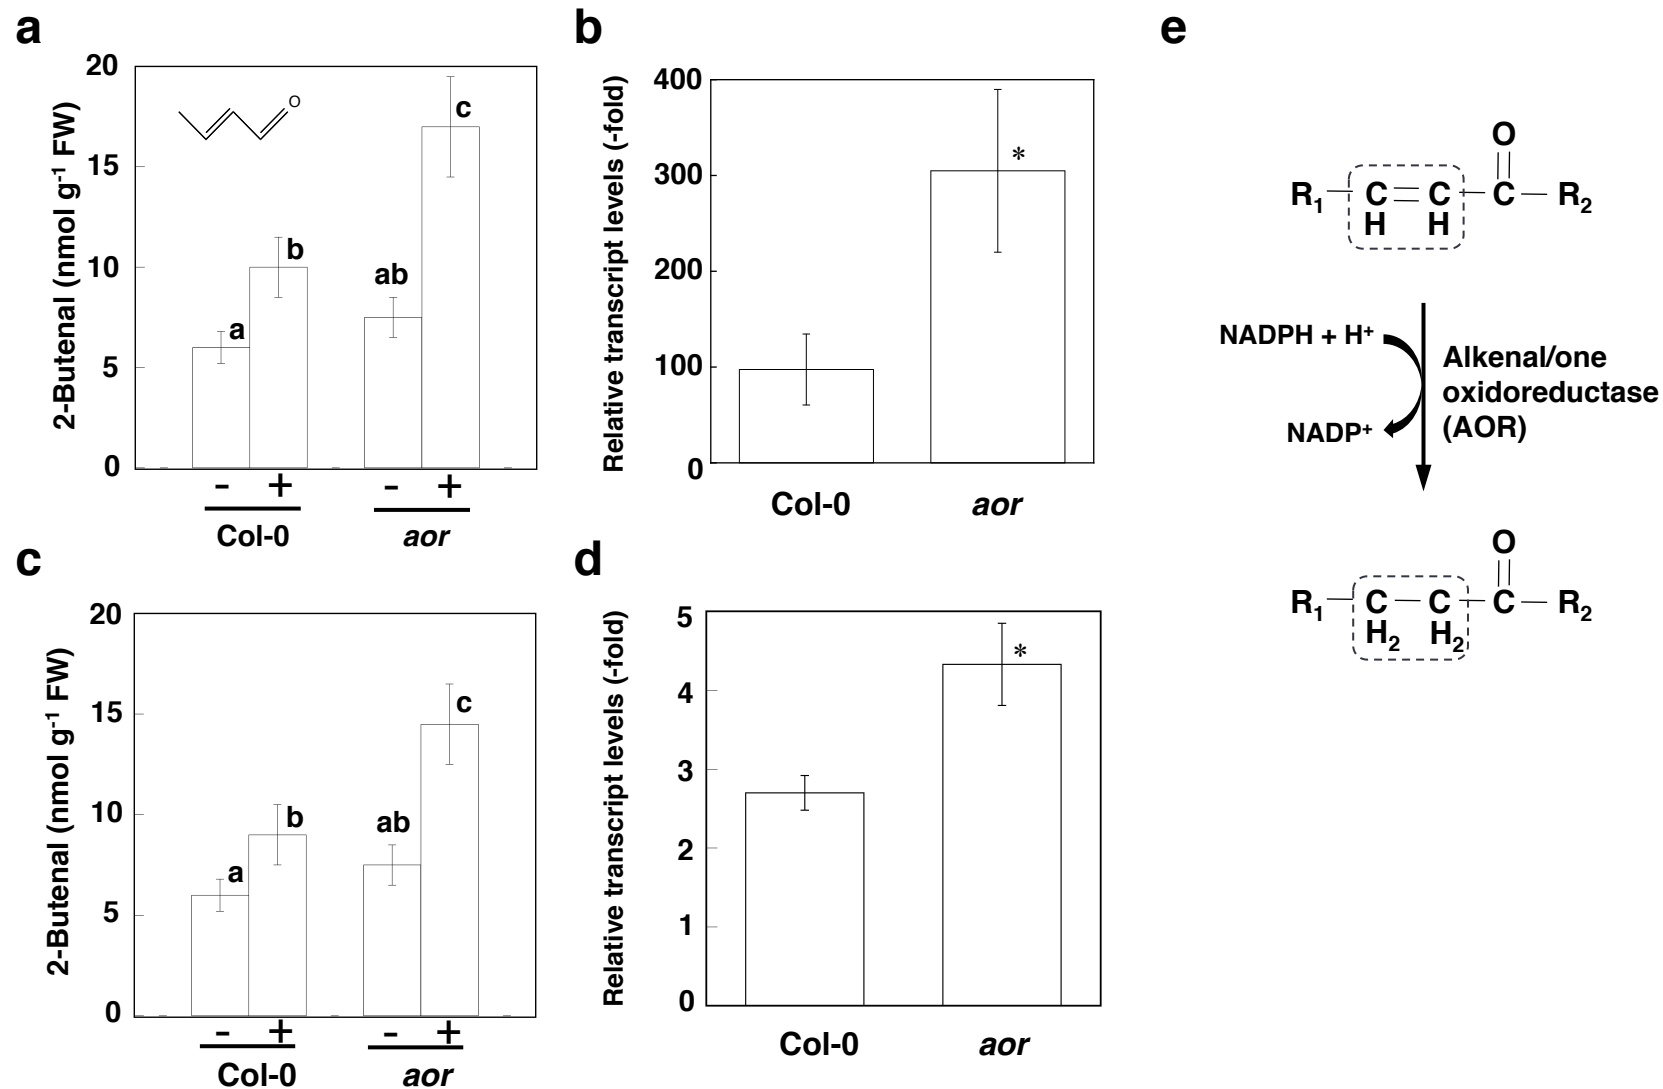

**Fig. S6. (Yamauchi)**

Estimation of (*E*)-2-butenal contents and HSFA2 expression in MV-treated (**a**, **b**) or UVB-treated (**c**, **d**) Arabidopsis. **a** and **c**, (*E*)-2-Butenal contents at 0 time (-) and after stress treatment (+). Data are means  $\pm$  SE ( $n = 4$ ). Values followed by the same letter are not significantly different according to Tukey-Kramer ( $P < 0.05$ ). **b** and **e**, Expression of *HSFA2* was enhanced in *aor* mutant under oxidative stress. *HSFA2* mRNA expression in Col-0 and *aor* was determined by qRT-PCR. Relative transcript levels were normalized to *ACTIN2* mRNA. The expression level of the 0 time sample was set to 1. Data are means  $\pm$  SE ( $n = 3$ ). (\*,  $P < 0.05$  vs Col-0, Student's *t*-test). Absolute *HSFA2* transcripts were approximately 5 copies  $\text{ng}^{-1}$  RNA in both Col-0 and *aor*. **e**, Alkenal/one oxidoreductase (AOR) catalyzes saturation of  $\alpha,\beta$ -unsaturated carbonyl bonds by using NADPH (shown in dotted box). RSLVs are good substrates for AOR<sup>19</sup>.

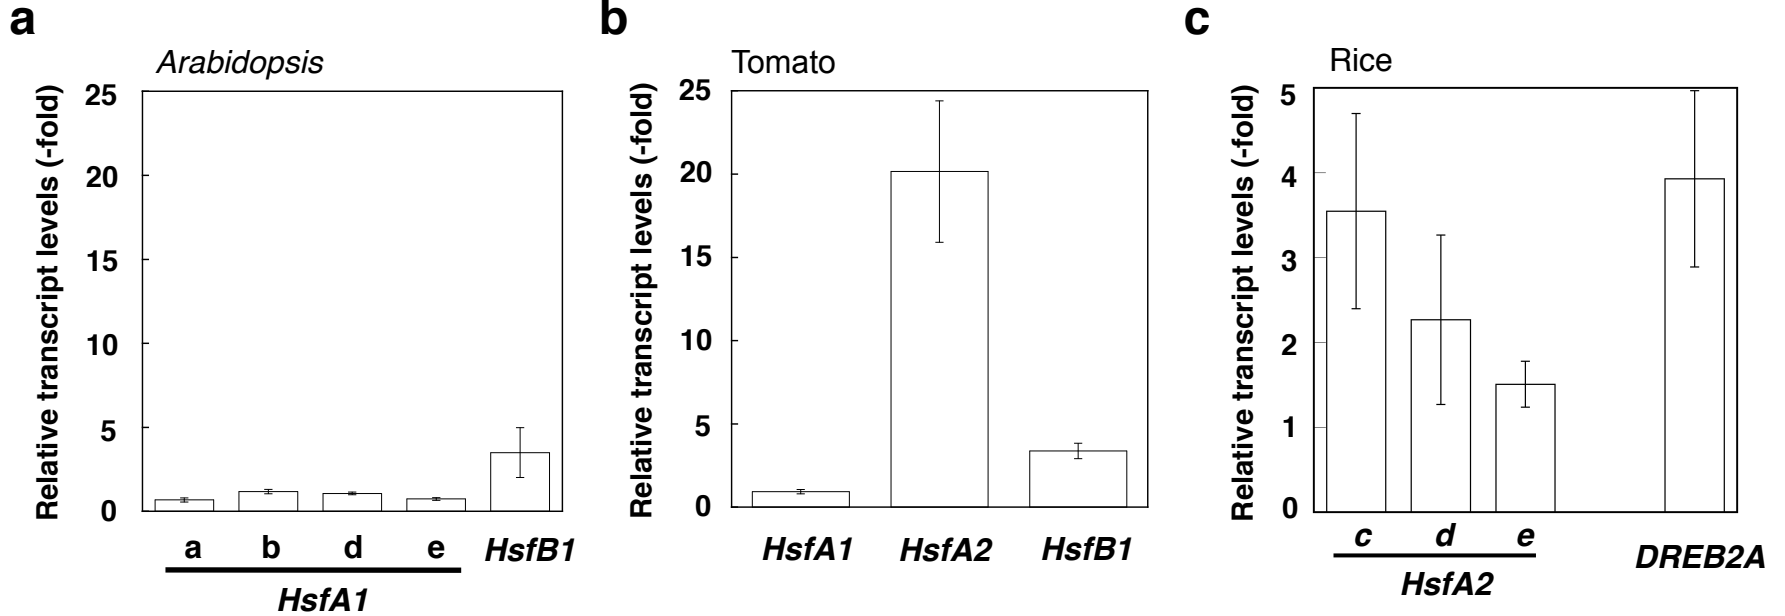

Fig. S7. (Yamauchi)

Expression of related transcription factors by (*E*)-2-Hexenal treatment in *Arabidopsis* (a), tomato (b) and rice (c). Tested plants were treated with (*E*)-2-hexenal (10 nmol cm<sup>-3</sup>) for 30 min, and then expression of each transcription factor gene was determined by qRT-PCR. Relative transcript levels were normalized to *ACTIN* mRNA. For each gene examined, the expression level in the MeCN-treated control sample was set to 1. Data are means  $\pm$  SE ( $n = 3$ ).



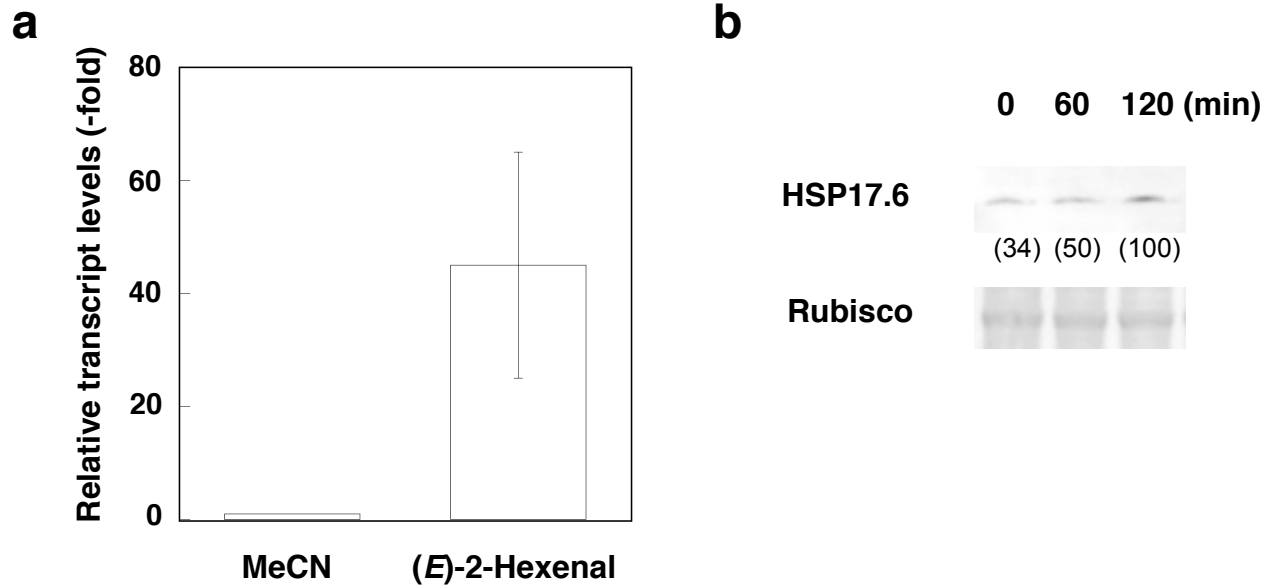

**Fig. S8. (Yamauchi)**

Induction of *HSFA2* expression and HSP17.6 production by RSLVs in *Arabidopsis* seedlings. **a**, *Arabidopsis* seedlings were exposed to (*E*)-2-hexenal (10 nmol cm<sup>-3</sup>) for 30 min, and then expression of *HSFA2* was determined using qRT-PCR. Relative transcript levels were normalized to *ACTIN2* mRNA. The expression level of the 0 h exposure sample was set to 1. Data are means  $\pm$  SE ( $n = 3$ ). **b**, After the indicated time of RSLV treatment, HSP17.6 proteins was detected by western blot analysis. Quantified value of each band by densitometric analysis is indicated in parenthesis. Maximal intensity is set to 100. Rubisco was stained using Coomassie Brilliant Blue R-250 as a loading control.

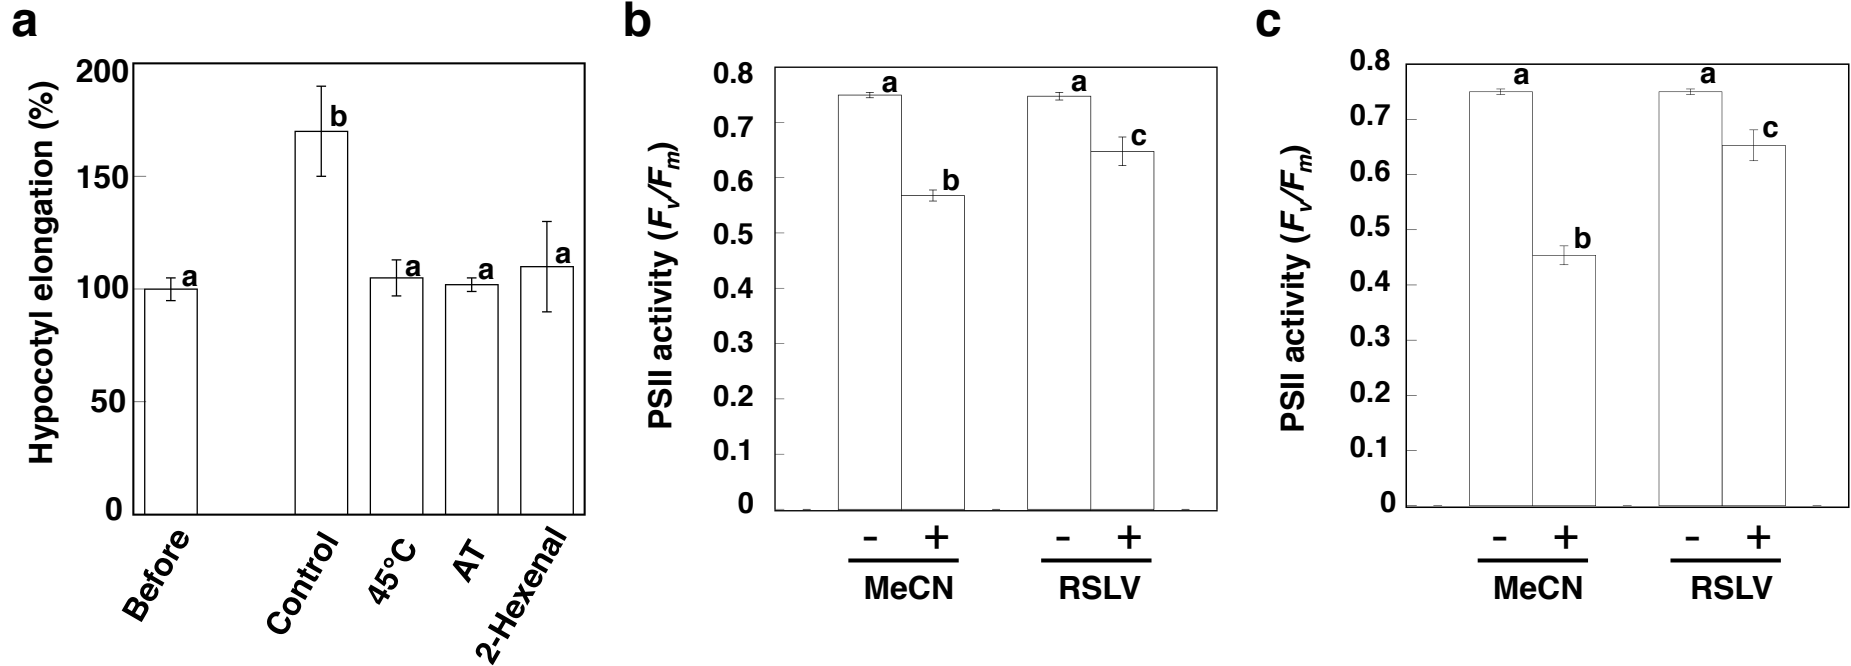

Fig. S9. (Yamauchi)

Effect of RSLV treatment on thermotolerance. **a**, The 5-day-old dark-grown QK seedlings (Before) were pretreated at 38°C for 90 min to acquire thermotolerance (AT) or 10  $\mu$ M (*E*)-2-hexenal for 2 h and then heat-stressed at 45°C for 2 h. Seedling were returned to 23°C in the dark and length was measured after 3 days. Length of seedlings before treatment was set to 100%, and elongation of each treatment was calculated. Schemes of treatment are shown in Fig. 3b. **b** and **c**, Effect of RSLVs on protection of PSII from heat (**b**) or UV-B treatment (**c**). Two-week-old *Arabidopsis* (Col-0) were pretreated with 10 nmol cm<sup>-3</sup> RGLV for an hour, and then treated with heat (45°C for 2h) or UV-B (1 mW cm<sup>-2</sup> for 30 min). Data are means  $\pm$  SE ( $n = 4$  or 5). Values followed by the same letter are not significantly different according to Tukey-Kramer ( $P < 0.05$ ).

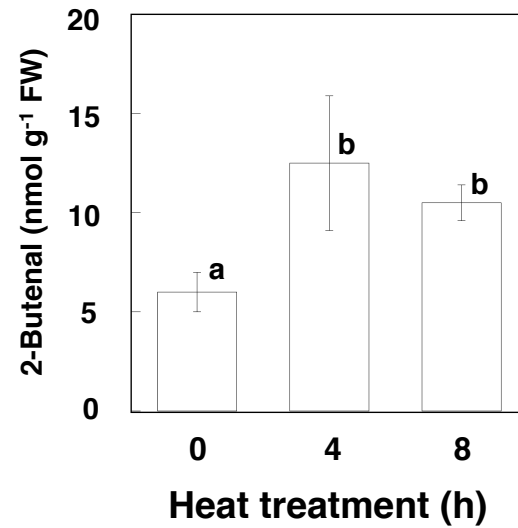

Fig. S10. (Yamauchi)

**2-Butenal contents in *Arabidopsis plants* under heat stress.** Data are means  $\pm$  SE ( $n = 3$ ). Values followed by the same letter are not significantly different according to Tukey-Kramer ( $P < 0.05$ ).

Original images shown in upper panel of Fig. 4a

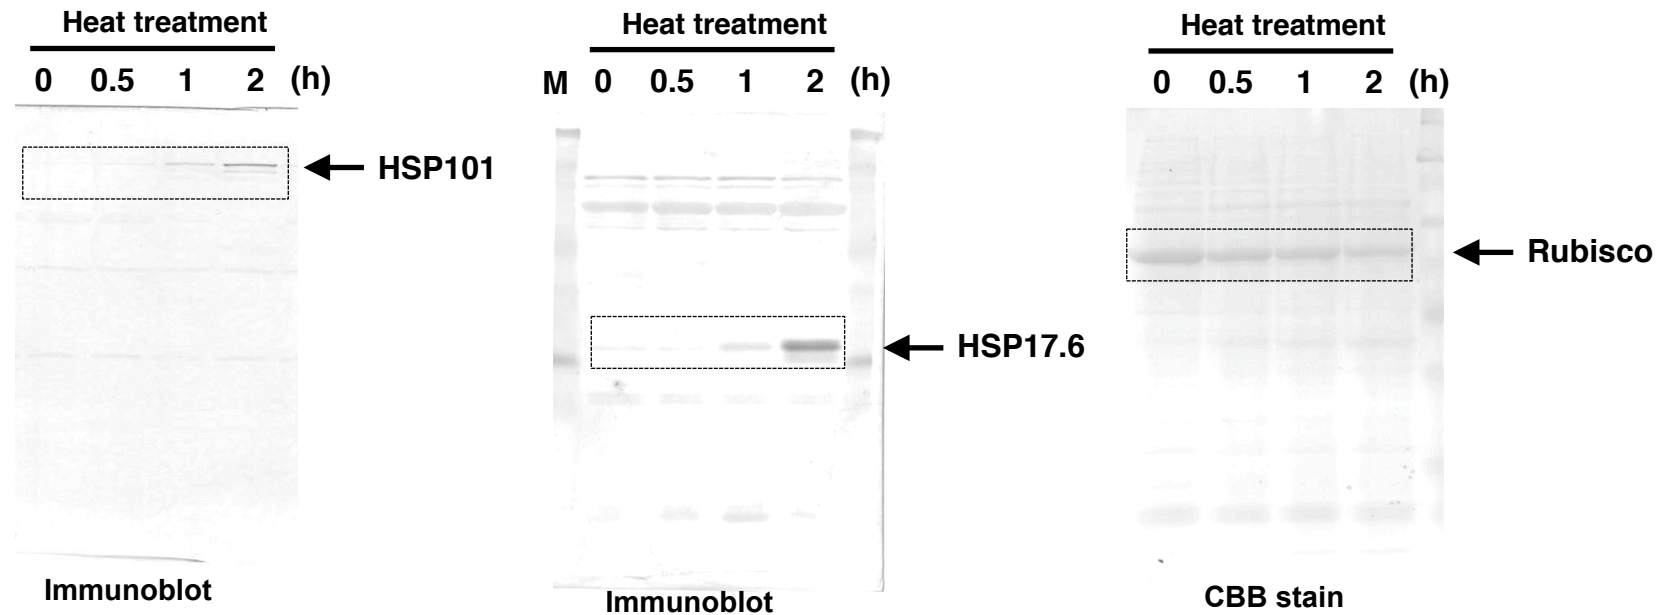

Original images shown in middle panel of Fig. 4a

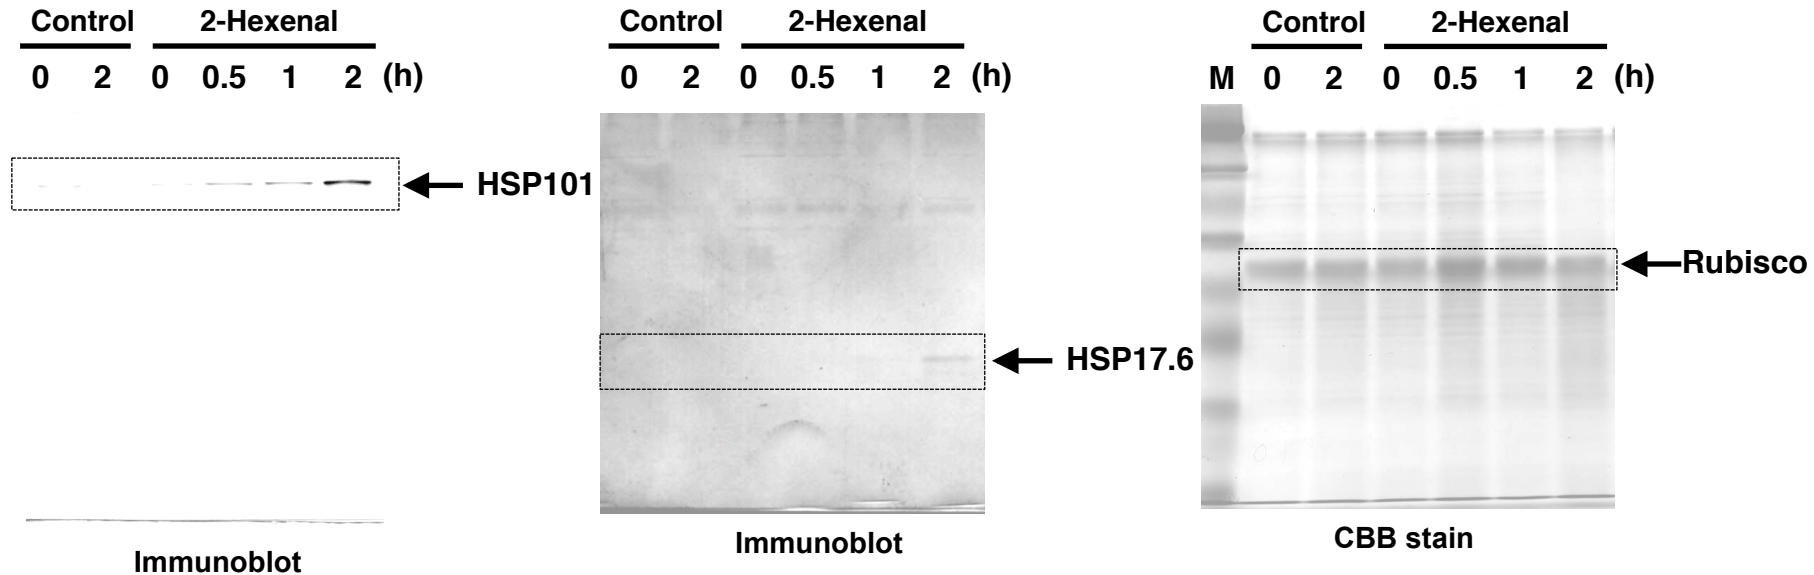

Fig. S11. (Yamauchi)

Original images shown in lower panel of Fig. 4a

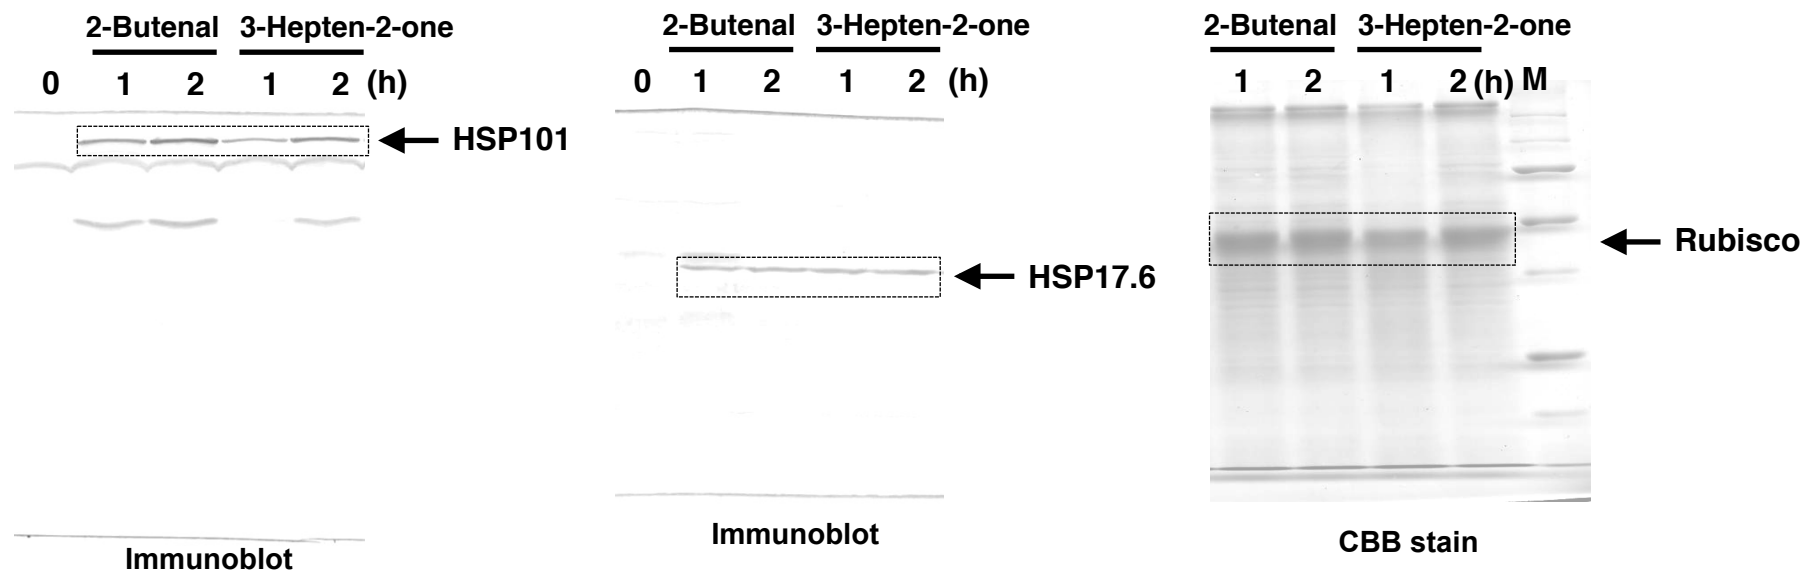

Fig. S11. (continued, Yamauchi)

**Original images shown in Fig. 4a.** Dotted boxes show cropped region shown in Fig. 4a. M, molecular weight marker.

**Table S1**

Descending order of Top100 up-regulated gene expression ratio [(*E*)-2-hexenal versus control] calculated from results of microarray. The "Ratio" values are the mean of 3 independent experiments,

| TAIR_ID   | Ratio<br>(log2) | SE<br>(log2) | DESCRIPTION                                                            |
|-----------|-----------------|--------------|------------------------------------------------------------------------|
| AT1G53540 | 5.52            | 0.09         | HSP17.6C-CI                                                            |
| AT2G26150 | 5.40            | 0.07         | ATHSFA2; DNA binding / transcription factor                            |
| AT1G59860 | 5.18            | 0.06         | HSP17.6A-CI                                                            |
| AT5G05410 | 5.04            | 0.10         | DREB2A; DNA binding / transcription factor/ transcriptional activator  |
| AT1G05575 | 5.00            | 0.04         | unknown protein                                                        |
| AT4G08555 | 4.71            | 0.06         | unknown protein                                                        |
| AT2G32120 | 4.63            | 0.01         | HSP70T-2; ATP binding                                                  |
| AT5G12030 | 4.63            | 0.02         | AT-HSP17.6A                                                            |
| AT5G12020 | 4.60            | 0.08         | HSP17.6II                                                              |
| AT5G27420 | 4.52            | 0.08         | protein binding / ubiquitin-protein ligase/ zinc ion binding           |
| AT2G46240 | 4.40            | 0.02         | BAG6; protein binding                                                  |
| AT3G29000 | 4.28            | 0.04         | calcium ion binding                                                    |
| AT4G25200 | 4.18            | 0.15         | ATHSP23.6-MITO (MITOCHONDRION-LOCALIZED SMALL HEAT SHOCK PROTEIN 23.6) |

|           |      |      |                                                                                    |
|-----------|------|------|------------------------------------------------------------------------------------|
| AT5G48570 | 4.05 | 0.06 | FK506 binding / calmodulin binding / peptidyl-prolyl cis-trans isomerase           |
| AT2G44840 | 4.04 | 0.15 | ATERF13; DNA binding / transcription factor                                        |
| AT4G27654 | 3.98 | 0.12 | unknown protein                                                                    |
| AT5G51440 | 3.90 | 0.04 | HSP23.5-M                                                                          |
| AT4G17500 | 3.90 | 0.19 | ATERF-1 (ETHYLENE RESPONSIVE ELEMENT BINDING FACTOR 1                              |
| AT1G22810 | 3.89 | 0.16 | AP2; DNA binding / transcription factor                                            |
| AT5G47230 | 3.87 | 0.10 | ATERF-5/ATERF5; DNA binding / transcription factor/ transcriptional activator      |
| AT1G03070 | 3.80 | 0.18 | glutamate binding                                                                  |
| AT5G37670 | 3.79 | 0.08 | HSP15.7CI                                                                          |
| AT5G14470 | 3.78 | 0.07 | ATP binding / galactokinase/ kinase/ phosphotransferase, alcohol group as acceptor |
| AT2G29500 | 3.78 | 0.03 | HSP17.6B-CI                                                                        |
| AT4G12400 | 3.72 | 0.03 | unknown protein                                                                    |
| AT3G50260 | 3.71 | 0.05 | CEJ1; ERF DNA binding / transcription factor                                       |
| AT2G37430 | 3.69 | 0.05 | ZAT11nucleic acid binding / transcription factor/ zinc ion binding                 |
| AT2G36800 | 3.68 | 0.07 | DOGT1 (DON-GLUCOSYLTRANSFERASE); UDP-glycosyltransferase                           |
| AT4G34131 | 3.58 | 0.07 | UDP-glycosyltransferase/ transferase, transferring hexosyl groups                  |
| AT5G04340 | 3.58 | 0.04 | ZAT6 C2H2; nucleic acid binding / transcription factor/ zinc ion binding           |
| AT1G07400 | 3.57 | 0.05 | HSP17.8-C1                                                                         |
| AT3G25250 | 3.57 | 0.09 | AGC2-1 (OXIDATIVE SIGNAL-INDUCIBLE1); kinase                                       |
| AT1G61340 | 3.55 | 0.14 | unknown protein                                                                    |

|           |      |      |                                                                           |
|-----------|------|------|---------------------------------------------------------------------------|
| AT1G71000 | 3.54 | 0.33 | HSP                                                                       |
| AT3G09350 | 3.51 | 0.11 | unknown protein                                                           |
| AT5G52640 | 3.50 | 0.02 | HSP81-1 (HEAT SHOCK PROTEIN 81-1); ATP binding / unfolded protein binding |
| AT5G54490 | 3.50 | 0.02 | PBP1 (PINOID-BINDING PROTEIN 1); calcium ion binding                      |
| AT5G14730 | 3.48 | 0.04 | unknown protein                                                           |
| AT1G16030 | 3.47 | 0.10 | HSP70B; ATP binding                                                       |
| AT2G32030 | 3.44 | 0.07 | N-acetyltransferase                                                       |
| AT3G08970 | 3.43 | 0.11 | heat shock protein binding / unfolded protein binding                     |
| AT5G42380 | 3.43 | 0.08 | calcium ion binding                                                       |
| AT5G64510 | 3.39 | 0.10 | unknown protein                                                           |
| AT5G59820 | 3.39 | 0.05 | ZAT12 RHL41 (RESPONSIVE TO HIGH LIGHT 41)                                 |
| AT1G56240 | 3.38 | 0.06 | ATPP2-B13                                                                 |
| AT1G35210 | 3.36 | 0.17 | unknown protein                                                           |
| AT3G02800 | 3.36 | 0.04 | phosphoprotein phosphatase                                                |
| AT5G66650 | 3.33 | 0.06 | unknown protein                                                           |
| AT3G28210 | 3.33 | 0.17 | PMZ                                                                       |
| AT1G21550 | 3.30 | 0.08 | calcium ion binding                                                       |
| AT1G52560 | 3.30 | 0.07 | HSP26.5-P                                                                 |
| AT1G02230 | 3.29 | 0.17 | ANAC004; transcription factor                                             |
| AT1G24140 | 3.27 | 0.07 | metalloendopeptidase/ metallopeptidase/ zinc ion binding                  |
| AT4G17490 | 3.24 | 0.02 | ATERF6 (ETHYLENE RESPONSIVE ELEMENT BINDING FACTOR 6)                     |



|           |      |      |                                                                          |
|-----------|------|------|--------------------------------------------------------------------------|
| AT3G23230 | 3.22 | 0.14 | ERF DNA binding / transcription factor                                   |
| AT5G39670 | 3.21 | 0.01 | calcium ion binding                                                      |
| AT5G63790 | 3.19 | 0.06 | ANAC102; transcription factor                                            |
| AT2G20560 | 3.18 | 0.06 | DNAJ; heat shock protein binding / unfolded protein binding              |
| AT4G21320 | 3.18 | 0.06 | HSA32                                                                    |
| AT4G10250 | 3.15 | 0.25 | ATHSP22.0                                                                |
| AT4G34135 | 3.12 | 0.08 | UDP-glycosyltransferase/ transferase, transferring hexosyl groups        |
| AT5G22140 | 3.12 | 0.06 | disulfide oxidoreductase/ electron carrier                               |
| AT5G52760 | 3.10 | 0.13 | metal ion binding                                                        |
| AT3G23170 | 3.09 | 0.13 | unknown protein                                                          |
| AT3G51910 | 3.05 | 0.04 | AT-HSFA7A; DNA binding / transcription factor                            |
| AT1G79410 | 3.04 | 0.03 | carbohydrate transporter/ sugar porter                                   |
| AT1G54050 | 3.03 | 0.07 | HSP17.4-CIII                                                             |
| AT5G10695 | 2.99 | 0.12 | unknown protein                                                          |
| AT1G78410 | 2.99 | 0.06 | unknown protein                                                          |
| AT3G11840 | 2.99 | 0.17 | ubiquitin-protein ligase                                                 |
| AT4G27670 | 2.97 | 0.31 | HSP21 (HEAT SHOCK PROTEIN 21)                                            |
| AT2G46400 | 2.96 | 0.15 | WRKY46; transcription factor                                             |
| AT2G22880 | 2.96 | 0.21 | unknown protein                                                          |
| AT4G23493 | 2.95 | 0.09 | unknown protein                                                          |
| AT5G47220 | 2.95 | 0.29 | ATERF-2/ATERF2/ERF2; DNA binding / transcription factor/ transcriptional |

|           |      |      |                                                                          |
|-----------|------|------|--------------------------------------------------------------------------|
|           |      |      | activator                                                                |
| AT3G56710 | 2.94 | 0.10 | SIB1 (SIGMA FACTOR BINDING PROTEIN 1); binding                           |
| AT3G10930 | 2.93 | 0.12 | unknown protein                                                          |
| AT3G49570 | 2.93 | 0.11 | unknown protein                                                          |
| AT1G74310 | 2.93 | 0.02 | ATHSP101 (HEAT SHOCK PROTEIN 101)                                        |
| AT2G29420 | 2.91 | 0.03 | ATGSTU7 (GLUTATHIONE S-TRANSFERASE 25); glutathione transferase          |
| AT1G72910 | 2.89 | 0.09 | transmembrane receptor                                                   |
| AT1G03850 | 2.88 | 0.20 | electron transporter/ thiol-disulfide exchange intermediate              |
| AT5G46295 | 2.88 | 0.15 | unknown protein                                                          |
| AT3G16050 | 2.88 | 0.04 | Atpdx1.2                                                                 |
| AT1G64950 | 2.88 | 0.07 | CYP89A5; heme binding / iron ion binding / monooxygenase/ oxygen binding |
| AT2G15480 | 2.87 | 0.06 | UDP-glycosyltransferase/ transferase, transferring glycosyl groups       |
| AT1G30070 | 2.86 | 0.05 | unknown protein                                                          |
| AT1G19020 | 2.85 | 0.11 | unknown protein                                                          |
| AT5G51190 | 2.81 | 0.08 | AP2; DNA binding / transcription factor                                  |
| AT4G37290 | 2.77 | 0.02 | unknown protein                                                          |
| AT3G24500 | 2.77 | 0.06 | MBF1c; DNA binding / transcription coactivator/ transcription factor     |
| AT1G27730 | 2.77 | 0.03 | ZAT10; nucleic acid binding / transcription factor/ zinc ion binding     |
| AT1G17870 | 2.76 | 0.08 | EGY3                                                                     |
| AT1G26800 | 2.75 | 0.08 | C3H4; transcription factor                                               |
| AT5G45630 | 2.75 | 0.20 | unknown protein                                                          |

|           |      |      |                                                                                      |
|-----------|------|------|--------------------------------------------------------------------------------------|
| AT5G57220 | 2.74 | 0.16 | CYP81F2; heme binding / iron ion binding / monooxygenase/ oxygen binding             |
| AT1G66090 | 2.74 | 0.07 | ATP binding / nucleoside-triphosphatase/ nucleotide binding / transmembrane receptor |
| AT1G74930 | 2.74 | 0.23 | ERF DNA binding / transcription factor                                               |
| AT2G26560 | 2.74 | 0.27 | PLP2                                                                                 |
| AT1G55920 | 2.74 | 0.10 | AtSerat2;1 (SERINE ACETYLTRANSFERASE 1)                                              |

---

**Table S2**

Primer sequences used in this study

| Target gene        | Forward                       | Reverse                       |
|--------------------|-------------------------------|-------------------------------|
| <i>Arabidopsis</i> |                               |                               |
| <i>Actin2</i>      | ACC AGC TCT TCC ATC GAG AA    | GAA CCA CCG ATC CAG ACA CT    |
| <i>HSFA1a</i>      | GAC GGG TTC TCA TCT CCA AA    | TCA TCA ATC TCG GGG TCT TC    |
| <i>HSFA1b</i>      | GAG GTG GGG AAG TTT GGA AT    | TTG TGC TGC TTC GTT TAT CG    |
| <i>HSFA1d</i>      | TCA GAA GCA ACC GAG AAC TG    | CCA TCC ATT TTG TTC CTG CT    |
| <i>HSFA1e</i>      | ATC GAT GAA CGA TGC AAC AA    | CTG TCT CGC ATC CAA CAA GA    |
| <i>HSFA2</i>       | GCA AGG AAC GTC ATC ATC TG    | ATC AGC AAG GAT CTG GGA TG    |
| <i>HSFB1</i>       | TTG GTT CGC CTT CTG AGT CT    | CTT TCA ACC ACA CCC CAA AC    |
| <i>ZAT12</i>       | GGC GAA TTG TTT GAT GCT TT    | CAA GCC ACT CTC TTC CCA CT    |
| <i>ZAT10</i>       | GCT TCT CCG ATT CCT CCT TT    | GAC CAC CGA GAG CTT GGT AA    |
| <i>MBF1c</i>       | GAG CAG ATA CCC AGG AGC AG    | TGA TCT GTT TCG CCA AAT CC    |
| <i>DREB2A</i>      | GTG GAG TGG AGC CGA TGT AT    | ATC GTC GCC ATT TAG GTC AC    |
| Tomato             |                               |                               |
| <i>Actin</i>       | AGC AAT ACC AGG GAA CAT GG    | GGA TCT TGC TGG TCG TGA TT    |
| <i>HSFA1</i>       | AGG AGG TCC CAC CAA CTT CT    | TCC CAC TTT TCC CTC AAC TG    |
| <i>HSFA2</i>       | GAT CTG GTG CTT GCA TTG AA    | TGG GGG TCA TCG TTA GTC TC    |
| <i>HSFB1</i>       | CAA AGG ATT TGC TTC CCA AA    | CCG TGA ACT GGG ACA ACT TT    |
| Rice               |                               |                               |
| <i>Actin1</i>      | GGA TCC ATC TTG GCA TCT C     | GTC AGA CTC GTC GTA CTC A     |
| <i>HSFA2c</i>      | GAG CAG TCA GAG TTG GAT GGC A | AAT CAA CTC TAT TTT GGA CTA A |
| <i>HSFA2d</i>      | CAA GAG ATG ATG CTG GGA TTC C | CTA TTG CTT AGA TAA CCC AGC T |
| <i>HSFA2e</i>      | GCT CGA TGA GGA TAC CAG GAA C | GCG ATT TGG TGC TGC TTG AGT T |
| <i>DREB2A</i>      | TAA GTG GGT GGC TGA GAT CC    | ATG AAG GTG CTG ATG TGC AG    |

## Reference

34. Frankel, E. N. Lipid oxidation. *Prog. Lipid Res.* **19**, 1-22 (1980).
